# Supplementary material for: Genetic diversity in migratory bats: Results from RADseq data for three tree bat species at an Ohio windfarm
Source: PeerJ journal article supplement (doi:10.7717/peerj.1647), 2016-01-26

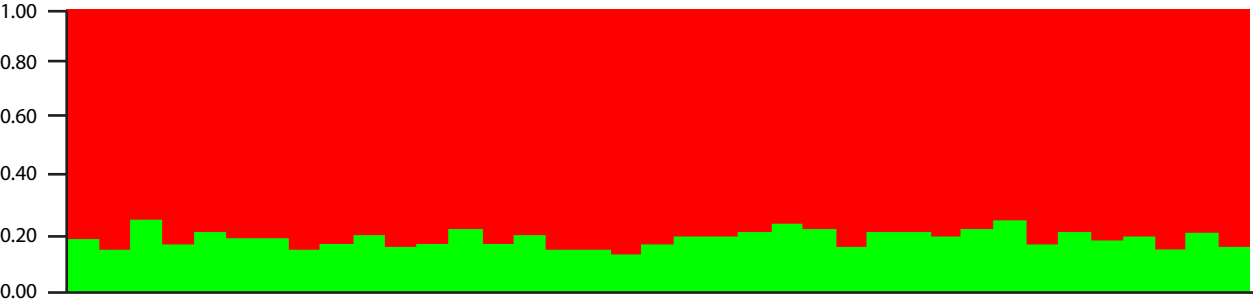

Supplement: FigS2_K2_Structure_SH.pdf [file FigS2_K2_Structure_SH.pdf]
